# Supplementary material for: Social Distancing in Chronic Migraine during the COVID-19 Outbreak: Results from a Multicenter Observational Study
Source: MDPI journal article supplement (doi:10.3390/nu13041361), 2021-04-19
Supplement: s1 [file s1]

## Supplementary material

**Supplementary Table S1.** Changes in physical activity (METs-min/wk) according to headache frequency change during social distancing.

|                         | Overall (n=261)  | Worsened (n=72)  | Improved (n=86)  | Stable (n=103)   |
|-------------------------|------------------|------------------|------------------|------------------|
| MET – Vigorous activity |                  |                  |                  |                  |
| Before                  | 0 (0-0)          | 0 (0-480)        | 0 (0-0)          | 0 (0-0)          |
| During                  | 0 (0-0)          | 0 (0-0)          | 0 (0-0)          | 0 (0-0)          |
| P value                 | <b>0.005</b>     | 0.322            | 0.232            | <b>0.013</b>     |
| MET – Moderate activity |                  |                  |                  |                  |
| Before                  | 200 (0-840)      | 120 (0-880)      | 480 (0-960)      | 0 (0-640)        |
| During                  | 0 (0-900)        | 0 (0-720)        | 320 (0-1200)     | 0 (0-720)        |
| P value                 | 0.467            | 0.856            | 0.878            | 0.214            |
| MET – Walking           |                  |                  |                  |                  |
| Before                  | 360 (45-840)     | 270 (0-788)      | 540 (90-945)     | 300 (90-630)     |
| During                  | 0 (0-210)        | 0 (0-315)        | 0 (0-196)        | 0 (0-180)        |
| P value                 | <b>&lt;0.001</b> | <b>&lt;0.001</b> | <b>&lt;0.001</b> | <b>&lt;0.001</b> |
| MET – Total             |                  |                  |                  |                  |
| Before                  | 1170 (240-3055)  | 1230 (360-2575)  | 1230 (360-2925)  | 870 (300-2640)   |
| During                  | 510 (0-2400)     | 630 (90-2625)    | 450 (0-2363)     | 360 (0-1980)     |
| P value                 | <b>&lt;0.001</b> | <b>0.003</b>     | <b>0.002</b>     | <b>0.006</b>     |
| Sitting time (minutes)  |                  |                  |                  |                  |
| Before                  | 190 (120-360)    | 240 (120-360)    | 240 (120-360)    | 180 (90-300)     |
| During                  | 360 (180-480)    | 360 (200-480)    | 360 (180-540)    | 300 (180-480)    |
| P value                 | <b>&lt;0.001</b> | <b>&lt;0.001</b> | <b>&lt;0.001</b> | <b>&lt;0.001</b> |
| Computer time (hours)   |                  |                  |                  |                  |
| Before                  | 2 (0-4)          | 2 (0-5)          | 2 (1-6)          | 2 (0-4)          |
| During                  | 2 (0-6)          | 3 (0.5-7)        | 2 (1-6)          | 2 (0-6)          |
| P value                 | <b>&lt;0.001</b> | <b>&lt;0.001</b> | 0.484            | <b>&lt;0.001</b> |

**Supplementary Table S2.** Changes in mean monthly portions of food according to headache frequency change during social distancing. Numbers in parentheses indicate P values.

|                        |         | Overall (n=261)  | Worsened (n=72)  | Improved (n=86)  | Stable (n=103)   |
|------------------------|---------|------------------|------------------|------------------|------------------|
| Protein-rich           | Before  | 16 (11-20)       | 15 (10-20)       | 16 (12-23)       | 15 (11-20)       |
|                        | During  | 16 (10-20)       | 15 (9-20)        | 16 (11-24)       | 15 (10-20)       |
|                        | P value | 0.071            | 0.079            | 0.576            | 0.389            |
| Carbohydrate-rich      | Before  | 75 (56-98)       | 75 (55-97)       | 81 (62-98)       | 72 (55-96)       |
|                        | During  | 78 (59-101)      | 77 (59-101)      | 88 (64-102)      | 75 (56-98)       |
|                        | P value | <b>&lt;0.001</b> | <b>&lt;0.001</b> | <b>0.002</b>     | <b>0.002</b>     |
| Dairies                | Before  | 16 (6-34)        | 16 (6-35)        | 20 (8-38)        | 15 (6-30)        |
|                        | During  | 16 (8-20)        | 19 (10-31)       | 19 (9-31)        | 15 (4-30)        |
|                        | P value | 0.117            | 0.416            | 0.119            | 0.056            |
| Eggs                   | Before  | 4 (4-8)          | 4 (4-8)          | 4 (4-8)          | 4 (3-7)          |
|                        | During  | 4 (4-8)          | 4 (4-8)          | 4 (4-8)          | 4 (4-8)          |
|                        | P value | <b>0.025</b>     | 0.482            | <b>0.044</b>     | 0.862            |
| Sweets/cakes/chocolate | Before  | 8 (2-15)         | 10 (4-20)        | 8 (4-16)         | 4 (1-12)         |
|                        | During  | 12 (4-22)        | 14 (4-26)        | 14 (6-26)        | 8 (2-16)         |
|                        | P value | <b>&lt;0.001</b> | <b>0.003</b>     | <b>&lt;0.001</b> | <b>&lt;0.001</b> |
| Sauces                 | Before  | 0 (0-4)          | 2 (0-4)          | 0 (0-4)          | 0 (0-4)          |
|                        | During  | 0 (0-4)          | 0 (0-4)          | 0 (0-4)          | 0 (0-2)          |
|                        | P value | 0.159            | 0.420            | 0.104            | 0.579            |
| Tea/coffee             | Before  | 50 (30-60)       | 32 (30-60)       | 30 (30-50)       | 30 (30-60)       |
|                        | During  | 30 (30-58)       | 35 (30-60)       | 30 (30-45)       | 30 (30-60)       |
|                        | P value | 0.229            | 0.677            | 0.261            | 0.844            |
| Alcohol-free beverages | Before  | 1 (0-8)          | 2 (0-10)         | 2 (0-8)          | 0 (0-6)          |
|                        | During  | 0 (0-10)         | 1 (0-10)         | 2 (0-12)         | 0 (0-8)          |
|                        | P value | <b>0.003</b>     | 0.075            | 0.059            | 0.190            |

|                     |         |              |              |              |            |
|---------------------|---------|--------------|--------------|--------------|------------|
| Alcoholic beverages | Before  | 0 (0-4)      | 0 (0-5)      | 2 (0-5)      | 0 (0-4)    |
|                     | During  | (0-4)        | 0 (0.4)      | 0 (0-6)      | 0 (0-4)    |
|                     | P value | 0.801        | 0.257        | 0.853        | 0.239      |
| Fruit               | Before  | 35 (16-58)   | 33 (16-51)   | 40 (17-61)   | 34 (19-50) |
|                     | During  | 35 (16-54)   | 38 (16-53)   | 36 (16-38)   | 33 (18-50) |
|                     | P value | 0.059        | 0.472        | <b>0.019</b> | 0.134      |
| Vegetables          | Before  | 52 (28-79)   | 51 (29-68)   | 61 (37-88)   | 50 (24-73) |
|                     | During  | 53 (29-91)   | 50 (32-69)   | 62 (36-86)   | 49 (24-73) |
|                     | P value | <b>0.003</b> | <b>0.011</b> | <b>0.029</b> | 0.813      |

---

**Supplementary Table S3.** Correlation between change in headache frequency and change in lifestyle habit scores during social distancing.

|                               | Change in frequency |              | Change in intensity |              |
|-------------------------------|---------------------|--------------|---------------------|--------------|
|                               | Rho                 | P value      | Rho                 | P value      |
| MET, vigorous activity        | -0.032              | 0.612        | +0.116              | 0.062        |
| MET, moderate activity        | -0.050              | 0.421        | +0.001              | 0.984        |
| MET, walking                  | -0.040              | 0.523        | -0.042              | 0.497        |
| MET, total                    | -0.042              | 0.497        | +0.020              | 0.747        |
| Protein-rich foods            | -0.031              | 0.613        | +0.078              | 0.206        |
| Carbohydrate-rich foods       | +0.032              | 0.605        | +0.016              | 0.801        |
| Dairies                       | +0.108              | 0.082        | +0.046              | 0.461        |
| Eggs                          | -0.057              | 0.355        | +0.023              | 0.712        |
| Sweets/cakes/chocolate        | -0.106              | 0.087        | +0.042              | 0.496        |
| Sauces                        | -0.027              | 0.661        | +0.098              | 0.113        |
| Tea/coffee                    | +0.077              | 0.214        | +0.120              | 0.053        |
| Alcohol-free beverages        | -0.011              | 0.860        | +0.105              | 0.090        |
| Alcoholic beverages           | -0.049              | 0.430        | -0.021              | 0.734        |
| Fruit                         | +0.115              | 0.063        | +0.051              | 0.416        |
| Vegetables                    | -0.043              | 0.485        | +0.118              | 0.057        |
| Insomnia Severity Index score | +0.208              | <b>0.001</b> | +0.160              | <b>0.010</b> |

**Supplementary Figure S1.** Box plots of changes in median METs (A), median monthly portions of carbohydrate-rich foods (B) and sweets.

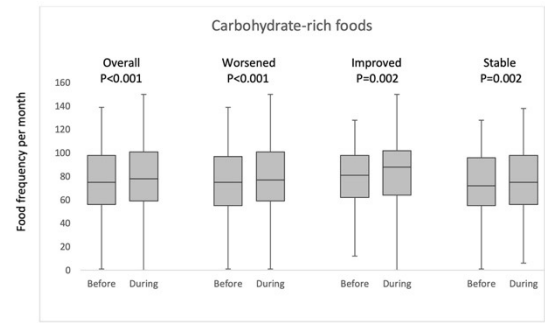

**A**

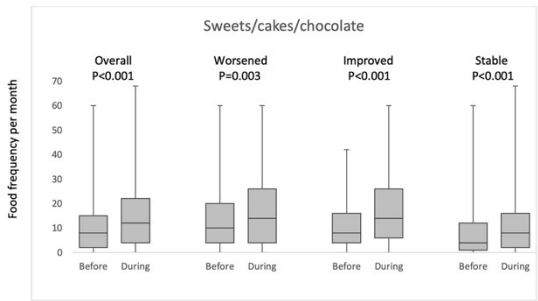

**B**
